# Deranged Platelet Calcium Homeostasis in Diabetic Patients With End-Stage Renal Failure

A possible link to increased cardiovascular mortality?

AURELIO M. VICARI, MD  
MARIA V. TAGLIETTI, MD  
FABIO PELLEGATTA, MD  
DONATELLA SPOTTI, MD

MARCO MELANDRI, MD  
LAURA GALLI, BSC  
PAOLA RONCHI, MD  
FRANCO FOLLI, MD

**OBJECTIVE** — Platelet hyperfunction is a typical feature of the prothrombotic state that frequently complicates the natural history of diabetes. In uremia, a bleeding diathesis is present, which principally involves the primary phase of hemostasis. Thus, in patients with uremia of diabetic origin, the infrequent coexistence of two opposite alterations of hemostasis takes place. In patients with uremia, an increased incidence of cardiovascular events and related mortality is observed. This phenomenon is greatly amplified in uremia of diabetic origin. Calcium homeostasis is a critical aspect of platelet function, which has recently become available in human diseases. The aim of this study was to evaluate calcium homeostasis in platelets from patients with uremia of diabetic and nondiabetic origin.

**RESEARCH DESIGN AND METHODS** — We evaluated, by means of Fura 2, the intracellular concentration of ionized calcium ( $[Ca^{2+}]_i$ ) in platelets from 18 patients with uremia of diabetic origin, 12 patients with uremia of nondiabetic origin, and 16 healthy control subjects.  $[Ca^{2+}]_i$  was evaluated in resting conditions and after stimulation with 0.05, 0.1, 0.5 U/ml thrombin.

**RESULTS** — Platelets from uremic patients with diabetes had higher resting  $[Ca^{2+}]_i$  than both control subjects ( $P = 0.01$ ) and uremic patients without diabetes ( $P = 0.001$ ). Similarly, after stimulation with thrombin, the absolute increase of  $[Ca^{2+}]_i$  was higher ( $P < 0.05$ ) in platelets from uremic patients with diabetes compared with both control subjects and uremic patients without diabetes. The relative increase of  $[Ca^{2+}]_i$  was higher ( $P < 0.05$ ) than normal in platelets from uremic patients after weak or intermediate strength thrombin. No correlation were present between  $[Ca^{2+}]_i$  values and other clinical and laboratory variables potentially associated with platelet hyperfunction.

**CONCLUSIONS** — Diabetes and uremia in combination further deteriorate the abnormal platelet calcium homeostasis observed in uremia.

Diabetes is a metabolic disorder characterized by both specific (microangiopathic) and nonspecific (macroangiopathic) vascular complications (1). An imbalance of the hemostatic system toward a prothrombotic state is frequently observed in diabetic patients even in the early phases of the disease (2) and becomes more evi-

dent during its course (3). Platelets are peculiarly involved: increased adhesiveness (4), hyperaggregability (5), enhanced release reaction (6), and increased turnover (7) have been described.

Although significantly mitigated by dialytic procedures, a bleeding diathesis still represents a major problem in uremic

patients (8). Primary hemostasis, i.e., the interaction between platelets and endothelium, is typically involved: enhanced production of prostacyclin (9) and nitric oxide (10) by endothelial cells, reduced platelet adhesiveness, mediated by low levels of von Willebrand factor (11), hypoaggregability (12), and defective production of thromboxane A<sub>2</sub> (13) have been observed in uremic patients. Not surprisingly, the skin bleeding time, a bedside test that explores the primary phase of hemostasis, is frequently prolonged in uremic patients (14). The factor(s) responsible for these alterations are still a matter of debate: a role for anemia (15), parathyroid hormone (16), and for uremic toxins (17) has been proposed, among many others.

Nephropathy is the diabetes-specific complication associated with the greatest mortality in both IDDM and NIDDM (1). This disease occurs in ~30–40% of diabetic patients after 10–15 years from the diagnosis, almost invariably progressing to overt renal failure (18). Recent studies indicate that ~600 cases of end-stage renal failure occur every year in the U.K. (19). In 1985, about one-third of all patients beginning renal replacement therapy in the U.S. had diabetes (20).

From a pathophysiological point of view, the development of a disorder associated with a bleeding tendency (uremia) in patients with a prothrombotic condition such as diabetes poses the interesting question of what the net result might be of two opposite forces acting on the hemostatic system.

We considered this still unchallenged question by studying a new and peculiar aspect of platelet physiology, i.e., ionized calcium homeostasis in two groups of patients with end-stage renal failure of diabetic and nondiabetic origin.

Intracellular ionized calcium is involved in the mechanisms of signal transduction that lead to platelet activation (21). It has recently become possible to measure the intracellular concentration of ionized calcium ( $[Ca^{2+}]_i$ ) by means of fluorescent

From the Departments of Medicine (A.M.V., M.V.T., F.P., P.R., F.F.), Nephrology and Dialysis (D.S., M.M.), and Statistics and Biometry (L.G.), IRCCS H. San Raffaele, Milano, Italy.

Address correspondence and reprint requests to Aurelio M. Vicari, MD, Medicina I, Ospedale San Raffaele, via Olgettina 60, 20132 Milano, Italy.

Received for publication 29 June 1995 and accepted in revised form 8 February 1996.

$[Ca^{2+}]_i$ , intracellular concentration of ionized calcium.

probes, which can also detect variations in  $[Ca^{2+}]_i$  such as those taking place during agonist-induced activation (22).

## RESEARCH DESIGN AND METHODS

A total of 30 patients were enrolled in the study after giving their informed consent. All of them had end-stage renal failure and had undergone hemodialysis three times weekly for at least 6 months. A total of 18 patients were affected by diabetic nephropathy. The diagnosis was based on the following criteria: diabetes clinically detected from at least 15 years; diabetic microangiopathy (i.e., retinopathy and/or neuropathy); latency between the first discovery of proteinuria and uremia. Twelve patients had nondiabetic uremia. In eight of these last ones, the etiology of renal failure was known: nephrovascular disease in five, and tuberculosis, focal glomerulosclerosis, rheumatoid arthritis in one patient each. The existence of clinically relevant arteriosclerosis was established by anamnestic and/or instrumental evidence of major atherothrombotic events in the cerebral, myocardial, and lower limb districts.

Patients were being treated with a variety of drugs, namely insulin, oral hypoglycemic agents, ACE inhibitors, clonidine, furosemide, digoxin,  $H_2$  receptor inhibitors, vitamin D, calcium salts. Patients affected by neoplasia or by other advanced organ insufficiencies, and those being treated with calcium channel blockers and with drugs known to interfere with platelet function were excluded.

Sixteen age- and sex-matched healthy subjects were chosen as control subjects. All the subjects were studied in the early morning hours after an overnight fast. All the patients were at the end of a short interdialytic period (i.e., they had received hemodialysis 2 days before).

Blood was drawn by clear puncture of an antecubital vein into plastic tubes containing 1 ml of 0.065 mol citric acid + 0.085 mol sodium citrate + 2% glucose monohydrate (ACD) solution, and platelets were processed and loaded with Fura-2 acetoxymethyl ester (Calbiochem, La Jolla, CA) as previously described (23). After the platelet washing procedures, the extracellular ionized calcium concentration was  $\sim 1 \mu\text{mol/l}$ . The fluorescence of the platelet suspension was recorded in a 37°C-thermostatted cuvette by means of a Perkin-Elmer LS-B5 fluorimeter (Perkin-Elmer Ltd., Beaconsfield, U.K.) at 340 and 380

Table 1—Clinical details of the study population

| Clinical and laboratory data            | Diabetic uremic patients | Nondiabetic uremic patients | Control subjects  |
|-----------------------------------------|--------------------------|-----------------------------|-------------------|
| n                                       | 18                       | 12                          | 16                |
| Age (years)                             | 49.9 $\pm$ 2.4           | 56 $\pm$ 4.9                | 48.9 $\pm$ 3.6    |
| Sex (M/F)                               | 9/9                      | 7/5                         | 9/7               |
| Diabetes type (I/II)                    | 10/8                     | —                           | —                 |
| Arteriosclerosis                        | 16 (88)                  | 5 (42)*                     | —                 |
| Dialysis time (months)                  | 23.1 $\pm$ 5.5           | 18.8 $\pm$ 3.5              | —                 |
| Mean blood pressure (mmHg)              | 127.3 $\pm$ 3.2          | 126.1 $\pm$ 3.0             | 103.2 $\pm$ 2.8†  |
| Glycosylated hemoglobin (%)             | 8.1 $\pm$ 0.3†           | 4.7 $\pm$ 0.2               | 5.0 $\pm$ 0.07    |
| Hematocrit (%)                          | 27.3 $\pm$ 0.7           | 24.4 $\pm$ 0.9              | 41.5 $\pm$ 0.57†  |
| Plasma creatinine ( $\mu\text{mol/l}$ ) | 813.28 $\pm$ 35.36       | 910.52 $\pm$ 61.88          | 80.44 $\pm$ 6.18† |
| Plasma cholesterol (mmol/l)             | 4.76 $\pm$ 0.25          | 4.90 $\pm$ 0.47             | 5.27 $\pm$ 0.15   |
| Plasma triglycerides (mmol/l)           | 2.13 $\pm$ 0.26          | 2.02 $\pm$ 0.4              | 1.23 $\pm$ 0.1†   |
| Bleeding time (min)                     | 6.3 $\pm$ 0.6            | 8.4 $\pm$ 1.3               | 4.4 $\pm$ 0.2†    |

Data are n, n (%), or means  $\pm$  SE. \* $P < 0.01$  vs. diabetic uremic patients. † $P < 0.001$  vs. diabetic uremic patients and nondiabetic uremic patients. ‡ $P < 0.001$  vs. nondiabetic uremic patients and control subjects.

nm excitation and 495 nm emission wavelengths. Fluorescence values were converted to  $[Ca^{2+}]_i$  values (nmol/l) by means of a computer on line with the fluorimeter. The following conversion formula was adopted

$$[Ca^{2+}]_i = K_d \times \frac{(R - F_{\min})}{(F_{\max} - R)} \times 3.97$$

where:

$K_d$  = dissociation constant for the dye at 37°C (= 224)

R = ratio of the fluorescence of the sample at 340 and 380 nm

$F_{\max}$  = R at the maximal fluorescence with CaCl 10 mmol/l in 10% Triton X-100 lysed cells

$F_{\min}$  = R at the minimal fluorescence with EGTA 10 mmol/l in 10% Triton X-100 lysed cells

Platelet  $[Ca^{2+}]_i$  was evaluated in two conditions: at rest and after the addition of 0.05, 0.1, and 0.5 U/ml thrombin (final concentrations). All the determinations were performed within 1 h of the end of the platelet-processing phase. In fact, we have observed that during this time interval platelet  $[Ca^{2+}]_i$  undergoes a progressive but not significant increase of  $\sim 10\%$ . To further reduce this small error, the sequence of the three thrombin stimulations was randomized in each subject.

Platelet  $[Ca^{2+}]_i$  was evaluated and expressed as follows: resting (nmol/l), absolute increase, after stimulation with thrombin (nmol/l), and relative increase, after stimulation with thrombin (ratio stimulated  $[Ca^{2+}]_i$ /resting  $[Ca^{2+}]_i$ ).

Glycosylated hemoglobin was determined by high-performance liquid chromatography. In our laboratory, the normal reference interval is 4–6%.

Human thrombin was from Sigma (St. Louis, MO). All the other chemicals were reagent grade.

Statistical analysis was performed using the Mann-Whitney U, Spearman correlation, and  $\chi^2$  tests, as requested. Data are means  $\pm$  SE.

**RESULTS** — The clinical and laboratory characteristics of the study population are shown in Table 1.

The typical behavior of the platelet  $[Ca^{2+}]_i$  curve in resting conditions and after the addition of 0.05 U/ml thrombin (final concentration) in subjects belonging to the three groups is shown in Fig. 1.

Platelet  $[Ca^{2+}]_i$  was evaluated three times in the resting state (i.e., before the addition of thrombin in increasing concentrations) in each subject. The three sets of values were very similar ( $P > 0.5$ ), so that each individual value is expressed as the mean of three determinations. Results are shown in Table 2.

Resting platelet  $[Ca^{2+}]_i$  was significantly higher in diabetic uremic patients compared with both nondiabetic uremic patients and control subjects. No significant differences were observed between control subjects and nondiabetic uremic patients.

After the addition of thrombin, a sharp rise of  $[Ca^{2+}]_i$  was observed in the three groups, which was proportional to the concentration of thrombin used.

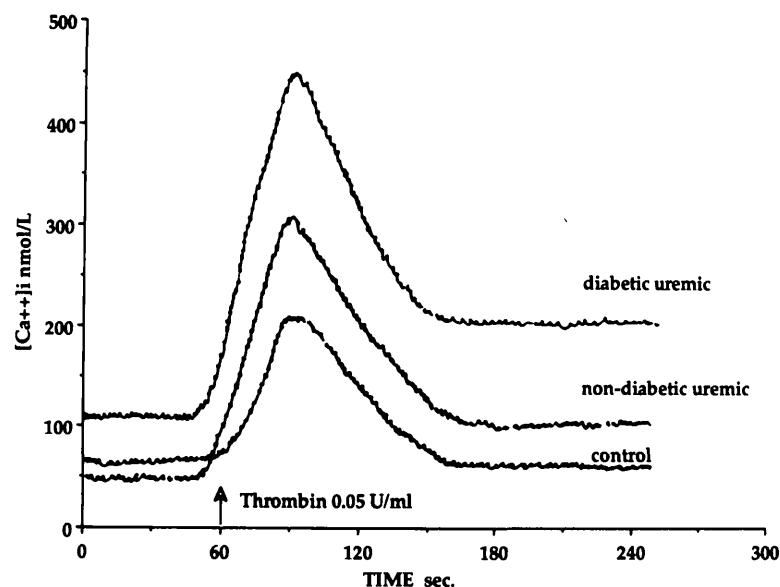

**Figure 1**—Representative behavior of the platelet  $[Ca^{2+}]_i$  curve at rest and after stimulation in the three study populations.

The absolute increase of platelet  $[Ca^{2+}]_i$  at each thrombin concentration was significantly higher in the diabetic uremic group compared with the nondiabetic uremic and control groups. A trend toward higher stimulated  $[Ca^{2+}]_i$  was observed in nondiabetic uremic patients compared with control subjects, never reaching statistical significance. Figure 2 illustrates the absolute increase of  $[Ca^{2+}]_i$  after 0.05 U/ml thrombin.

The relative increase of platelet  $[Ca^{2+}]_i$  was higher in uremic patients, with and without diabetes, than in control subjects, after 0.05 U/ml thrombin (Fig. 3). After 0.1 U/ml thrombin, only nondiabetic uremic patients showed a higher relative increase of platelet  $[Ca^{2+}]_i$ , compared with control subjects. No differences were observed with 0.5 U/ml thrombin.

No correlations were found in the three groups between resting or stimulated  $[Ca^{2+}]_i$  and the following: anagraphic age, dialytic age, mean arterial pressure, vascu-

lar status, bleeding time, glycosylated hemoglobin, hematocrit, plasma hemoglobin, creatininemia, cholesterolemia, triglyceridemia.

**CONCLUSIONS**—As in other cellular systems capable of graded reactions to exogenous stimuli, variations in the concentration of cytosolic calcium ions represent an important feature of platelet physiology. In resting platelets,  $[Ca^{2+}]_i$  is maintained within constant levels by membrane-associated ionic pumps (24). When an agonist interacts with its specific receptor(s) on the platelet plasma membrane, the system of G proteins transduces the signal to the cytoplasmic side of the membrane (25), and a massive influx of calcium ions from both the surrounding medium and the intracellular storage organelles takes place, leading to a sharp, transient increase of  $[Ca^{2+}]_i$  (24). This is pivotal to many aspects of the platelet response, leading to biochemical phenom-

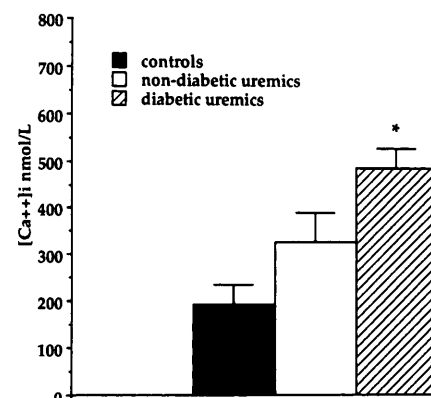

**Figure 2**—Absolute increase of platelet  $[Ca^{2+}]_i$  after stimulation with 0.05 U/ml thrombin. Data are means  $\pm$  SE. \* $P < 0.01$  vs. nondiabetic uremic patients and  $P < 0.001$  vs. control subjects.

ena such as protein kinase C activation (26), myosin light chain phosphorylation (27), phospholipase A2 activation (28), and to ultrastructural modifications such as shape change (29), centralization and release of cytoplasmic granules (30), and aggregation (31).

In the present study, Fura-2 was chosen among fluorescent probes because it is probably the most suitable agent for the study of  $[Ca^{2+}]_i$  in single cells (22). Thrombin was chosen because of its recognized role of physiological platelet agonist, the most frequently used in platelet calcium handling studies (32).

The present study was undertaken to evaluate ionized calcium homeostasis in a peculiar disease, end-stage renal failure of diabetic origin, where conditions capable of both activating and depressing platelet function coexist. However, some interesting information about platelet calcium homeostasis in patients with end-stage renal failure of nondiabetic origin was also obtained.

Platelet calcium homeostasis has consistently been found deranged beyond the upper limits of normality in diabetic

**Table 2**—Platelet  $[Ca^{2+}]_i$  in resting conditions and after thrombin

|                             | n  | Resting       | After thrombin                 |                               |                                |
|-----------------------------|----|---------------|--------------------------------|-------------------------------|--------------------------------|
|                             |    |               | 0.05 U/ml                      | 0.1 U/ml                      | 0.5 U/ml                       |
| Diabetic uremic patients    | 18 | 106 $\pm$ 10* | 486 $\pm$ 41† (4.9 $\pm$ 0.7)‡ | 577 $\pm$ 56† (5.4 $\pm$ 0.8) | 835 $\pm$ 144† (7.9 $\pm$ 1.3) |
| Control subjects            | 16 | 71 $\pm$ 3    | 192 $\pm$ 44 (1.8 $\pm$ 0.2)   | 256 $\pm$ 50 (2.6 $\pm$ 0.2)  | 420 $\pm$ 26 (5.3 $\pm$ 0.7)   |
| Nondiabetic uremic patients | 12 | 57 $\pm$ 6    | 327 $\pm$ 65 (5.7 $\pm$ 1.1)‡  | 403 $\pm$ 81 (6.5 $\pm$ 1.2)‡ | 530 $\pm$ 88 (8.3 $\pm$ 1.3)   |

Data are means  $\pm$  SE. Results are expressed as nmol/l or ratio (in parentheses). \* $P < 0.01$  vs. control subjects and  $P < 0.001$  vs. nondiabetic uremic patients. † $P < 0.001$  vs. control subjects and  $P < 0.05$  vs. nondiabetic uremic patients. ‡ $P < 0.05$  vs. control subjects.

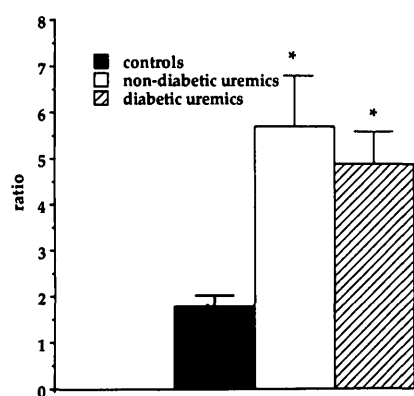

**Figure 3**—Relative increase of platelet  $[Ca^{2+}]_i$  after stimulation with 0.05 U/ml thrombin. Data are means  $\pm$  SE. \*P < 0.05 vs. control subjects.

patients. High  $[Ca^{2+}]_i$  in platelets from both type I and II diabetic patients was demonstrated in resting conditions and after challenge with various agonists (23,33–36), such a finding being attributed to platelet hyperfunction.

We have previously reported that platelets from diabetic patients with an unsatisfactory metabolic control have higher resting  $[Ca^{2+}]_i$  than platelets from both healthy subjects and from satisfactorily controlled diabetic patients (23). The present results are in line with this observation: in fact, patients with renal failure of diabetic origin had a mean glycosylated hemoglobin of 8.1%, this featuring an unsatisfactory metabolic control.

Our two patient populations were remarkably similar, apart from two important differences, namely a higher glycosylated hemoglobin and a higher prevalence of arteriosclerosis in the diabetic group. We nevertheless believe that such differences are almost intrinsic to the study inclusion criteria. In fact, recent data from the EDTA Registry have highlighted the markedly increased relative risk of ischemic heart disease in diabetic patients on renal replacement regimens, the rate of death from myocardial infarction being 10 times higher in diabetic than in nondiabetic patients (37).

Various signs of platelet hyperfunction have been reported in patients with arteriosclerosis, namely reduced half-life (7), in vitro hyperaggregability (38), pathologic release of  $\alpha$ -granule contents (39), and excessive synthesis of thromboxane A<sub>2</sub> (40). Recently, we and others have observed that calcium homeostasis is upregulated in platelets from patients with

severe arteriosclerosis and other thrombotic disorders (41–43). Indeed, arteriosclerotic vascular disease was clinically detectable in a consistent number of patients participating in the present study. This fact is not surprising considering that accelerated arteriosclerosis is a recognized feature of complicated diabetes (44). Cardiovascular and cerebrovascular events account for the majority of the excess deaths seen in diabetic patients on hemodialysis. These two causes account for over half the deaths and most occur within 2 years of the beginning of dialysis (45,46). Also in chronic renal failure of nondiabetic origin, especially when maintenance hemodialysis is given, arteriosclerosis is frequently present (47). Thus, we are induced to conclude that diabetes and its macrovascular complications together are responsible for the difference between the two uremic populations in calcium homeostasis. The relative contributions of these two pathological variables are therefore not easily assessable.

Only longitudinal studies covering the natural history of diabetes from the uncomplicated period through the early nephropathic stage to end-stage renal failure could clarify the interrelationship between diabetes, arteriosclerosis, and uremia in terms of platelet calcium homeostasis.

Diabetic nephropathy develops in a definite subset of patients, and in this subgroup of patients increased lithium-sodium countertransport and microalbuminuria are the hallmarks of incipient end-stage renal failure (48,49). Thus, it cannot be excluded that, together with unsatisfactory metabolic control, a genetically determined component might play a role in the deranged calcium homeostasis observed in diabetic patients with end-stage renal disease. It is tempting to hypothesize that, besides the well-known alteration of the lithium-sodium countertransport system, a more general defect in the cellular mechanisms controlling transmembrane ion homeostasis is a characteristic of diabetes complicated by end-stage renal failure.

In the present study, in platelets from patients with end-stage renal failure of non-diabetic origin, a higher than normal relative increase of  $[Ca^{2+}]_i$  was observed, after weak (0.05 U/ml) and intermediate (0.1 U/ml) thrombin stimulation. In this respect, platelets from patients with end-stage renal failure of nondiabetic origin

behaved almost in the same way as those from their diabetic counterparts. We have previously reported that thrombin induces a lower than normal relative increase of  $[Ca^{2+}]_i$  in platelets from patients with severe arteriosclerosis (43), while in platelets from diabetic patients it was generally unaltered (23). So, when analyzed from this different point of view, our data bring us to the conclusion that uremia per se is able to modify platelet calcium homeostasis by mechanisms different from those observed in other pathological conditions. Enhanced synthesis of nitric oxide has been described in uremia, and this could explain the state of platelet hypofunction observed in this syndrome (10). The increase of  $[Ca^{2+}]_i$ , normally induced by agonists in platelets is inhibited in vitro by nitric oxide donors, which antagonize calcium influx from both intra- and extra-cellular compartments, by activating cyclic guanosine monophosphate (cGMP)-dependent protein kinase (50) and inducing reversible inactivation of protein kinase C activity (51). Considering the very short half-life of nitric oxide (52), one can speculate that platelets taken from uremic patients, whose environment rapidly changes from high levels to absence of nitric oxide, undergo a rebound phenomenon, responsible for their enhanced response to thrombin.

**Acknowledgments**— We wish to thank Prof. Jacopo Meldolesi for making available to us the fluorimeter, and Prof. Guido Pozza for continuous support.

## References

1. Nathan DM: Long-term complications of diabetes mellitus. *N Engl J Med* 328: 1676–1685, 1993
2. Vicari AM, Macagni A: Primary platelet activation in recent-onset type 1 diabetes mellitus. *Scand J Clin Lab Invest* 50: 429–443, 1990
3. Winocour PD: Platelet abnormalities in diabetes mellitus. *Diabetes* 41 (Suppl. 2):26–31, 1992
4. Hellem AJ: Adenosine diphosphate-induced platelet adhesiveness in diabetes mellitus with complications. *Acta Med Scand* 90:291–295, 1971
5. Colwell JA, Haluska PV, Sarji K: Altered platelet function in diabetes mellitus. *Diabetes* 25:826–831, 1976
6. Burrows AW, Chavin SI, Hockaday TDR: Plasma thromboglobulin concentrations in diabetes mellitus. *Lancet* i:235–237, 1979
7. Kinlough-Rathborne RL, Packham MA,

- Mustard JF: Vessel injury, platelet adherence, and platelet survival. *Arteriosclerosis* 3:529-546, 1983
8. Remuzzi G: Bleeding in renal failure. *Lancet* i:1205-1208, 1988
  9. Remuzzi G, Cavenaghi AE, Mecca G, Donati MB, De Gaetano G: Prostacyclin-like activity and bleeding in renal failure. *Lancet* ii:1195-1197, 1977
  10. Noris M, Benigni A, Boccardo P, Aiello S, Gaspari F, Todeschini M, Figliuzzi M, Remuzzi G: Enhanced nitric oxide synthesis in uremia: implications for platelet dysfunction and dialysis hypotension. *Kidney Int* 44:445-450, 1993
  11. Kazatchkine M, Sultan Y, Caen JP, Bariety J: Bleeding in renal failure: a possible cause. *Br Med J* 2:612-615, 1976
  12. Evans EP, Branch RA, Bloom AL: A clinical and experimental study of platelet function in chronic renal failure. *J Clin Pathol* 25:745-753, 1987
  13. Remuzzi G, Benigni P, Dodesini P, Schieppati A, Livio M, Day JS, Smith WL, Pinca E, Patrignani P, Patrono C: Reduced platelet thromboxane formation in uremia: evidence for a functional cyclooxygenase defect. *J Clin Invest* 71:762-768, 1983
  14. Gordge MP, Faint RW, Rylance PB, Neild GH: Platelet function and the bleeding time in progressive renal failure. *Thromb Haem* 60:83-87, 1988
  15. Fernandez F, Goudable C, Sie P, Ton-That H, Durand D, Suc JM, Boneu B: Low haematocrit and prolonged bleeding time in uraemic patients: effect of red cell transfusions. *Br J Haematol* 59:139-148, 1985
  16. Massry SG, Goldstein DA: The search for uremic toxin(s) "X". "X" = PTH. *Clin Nephrol* 11:181-189, 1979
  17. Castaldi PA, Rozenberg MC, Stewart JH: The bleeding disorder of uremia. A qualitative platelet defect. *Lancet* i:66-69, 1966
  18. Retting B, Teutsh SM: The incidence of end-stage renal disease in type I and type II diabetes mellitus. *Diab Nephrop* 3:26-27, 1984
  19. Joint Working Party on Diabetic Renal Failure: Renal failure in diabetes in the UK: deficient provision of care in 1985. *Diabetic Med* 5:79-84, 1988
  20. Eggers PW: Effect of transplantation on the Medicare end-stage renal disease program. *N Engl J Med* 318:223-229, 1988
  21. Rink TJ, Sage SO: Calcium signaling in human platelets. *Annu Rev Physiol* 52:431-449, 1990
  22. Grynkiewicz G, Poenie M, Tsien RY: A new generation of  $Ca^{++}$  indicators with greatly improved fluorescence properties. *J Biol Chem* 260:3440-3450, 1985
  23. Pellegatta F, Folli F, Ronchi P, Caspani L, Galli L, Vicari AM: Deranged platelet calcium homeostasis in poorly controlled IDDM patients. *Diabetes Care* 16:178-183, 1993
  24. Scharf O, Foder B: Regulation of cytosolic calcium in blood cells. *Phys Rev* 73:547-582, 1993
  25. Manning DR, Brass LF: The role of GTP-binding proteins in platelet activation. *Thromb Haem* 66:393-399, 1991
  26. Takai Y, Kishimoto A, Kikkawa U, Mori T, Nishizuka Y: Unsaturated diacylglycerol as a possible messenger for the activation of calcium-activated, phospholipid-dependent protein kinase system. *Biochem Biophys Res Commun* 91:1218-1224, 1979
  27. Daniel JL, Molish JR, Holmsen H: Myosin phosphorylation in intact platelets. *J Biol Chem* 259:9826-9831, 1981
  28. Billah MM, Lapetina EG, Cuatrecasas P: Phospholipase A2 and phospholipase C activities of platelets: differential substrate specificity,  $Ca^{++}$  requirement, pH dependence, and cellular localization. *J Biol Chem* 255:10227-10231, 1980
  29. Rink TJ, Smith SW, Tsien RY: Cytoplasmic free  $Ca^{++}$  in human platelets:  $Ca^{++}$  thresholds and  $Ca$ -independent activation for shape change. *FEBS Lett* 148:21-26, 1982
  30. Knight DE, Scrutton MC: Direct evidence for a role for  $Ca^{++}$  in amine storage granule secretion by human platelets. *Thromb Res* 20:437-446, 1980
  31. Brass LF, Shattil SJ: Identification and function of the high affinity binding sites for  $Ca^{++}$  on the surface of platelets. *J Clin Invest* 73:626-632, 1984
  32. Siess W: Molecular mechanisms of platelet activation. *Phys Rev* 69:58-178, 1989
  33. Mazzanti L, Rabini RA, Faloia E, Fumelli P, Bertoli E, De Piro R: Altered cellular  $Ca^{++}$  and  $Na^{+}$  transport in diabetes mellitus. *Diabetes* 39:850-854, 1990
  34. Bergh CH, Hjalmarson A, Holm G, Angwald E, Jacobsson B: Studies on calcium exchange in platelets in human diabetes. *Eur J Clin Invest* 18:92-97, 1988
  35. Ishii H, Umeda F, Hashimoto T, Nawata H: Increased intracellular calcium mobilization in platelets from patients with type 2 (non-insulin-dependent) diabetes mellitus. *Diabetologia* 34:332-336, 1991
  36. Tschope D, Rosen P, Gries FA: Increase in the cytosolic concentration of calcium in platelets of diabetics type II. *Thromb Res* 62:421-428, 1991
  37. Raine AEG, Mac Mahon SM, Selwood NH, Wing AJ, Brunner FP: Mortality from myocardial infarction in patients on renal replacement therapy in the UK (Abstract). *Nephrol Dial Transpl* 6:902, 1991
  38. Packham MA, Mustard JF: Platelet aggregation: relevance to thrombotic tendencies. *Adv Exp Med Biol* 102:51-72, 1978
  39. Sobel M, Salzman EW, Davies GC, Handin RI, Sweeney J, Ploetz J, Kurland G: Circulating platelet products in unstable angina pectoris. *Circulation* 63:300-306, 1981
  40. Fitzgerald DJ, Roy L, Catella F, Fitzgerald GA: Platelet activation in unstable coronary disease. *N Engl J Med* 315:983-989, 1986
  41. Ahn YS, Jy W, Harrington WJ, Shanbaky N, Fernandez LF, Haynes DH: Increased platelet calcium in thrombosis and related disorders and its correction with nifedipine. *Thromb Res* 45:135-143, 1987
  42. Joseph R, Welch KMA, Grunfeld S, Oster SB, D'Andrea G: Baseline and activated platelet cytoplasmic calcium in acute ischemic stroke. Effect of aspirin. *Stroke* 19:1236-1238, 1988
  43. Vicari AM, Monzani ML, Pellegatta F, Ronchi P, Galli L, Folli F: Platelet calcium homeostasis is abnormal in patients with severe arteriosclerosis. *Arterioscler Thromb* 14:1420-1424, 1994
  44. Kannel WB, McGee DL: Diabetes and cardiovascular disease: the Framingham study. *JAMA* 241:2035-2040, 1979
  45. Whitley KY, Shapiro FL: Haemodialysis for end-stage diabetic nephropathy. In *Diabetic Renal-Retinal Syndrome. Vol 3: Therapy*. Friedman EA, L'Esperance FA Jr, Eds. New York, Grune and Stratton, 1986, p. 349-362
  46. Jacobs C, Brunner FP, Brynner H, Shallah S, Kramer P, Selwood NH, Wing AJ: The first five thousand diabetics treated by dialysis and transplantation in Europe. *Diabet Nephrop* 2:12-16, 1983
  47. Lindner A, Charra B, Sherrard DJ, Scribner BH: Accelerated atherosclerosis in prolonged maintenance hemodialysis. *N Engl J Med* 290:697-701, 1974
  48. Krowlewski AS, Canessa M, Warram JH, Loffel LM, Christlieb AR, Knowler WC, Pend LI: Predisposition to hypertension and susceptibility to renal disease in insulin-dependent diabetes mellitus. *N Engl J Med* 318:140-145, 1988
  49. Viberti G, Hill RD, Jarrett RJ, Argyropoulos A, Mahmud U, Keen H: Microalbuminuria as a predictor of clinical nephropathy in insulin-dependent diabetes mellitus. *Lancet* i:1430-1432, 1982
  50. Geiger J, Nolte C, Butt E, Sage O, Walter U: Role of cGMP and cGMP-dependent protein kinase in nitrovasodilator inhibition of agonist-evoked calcium elevation in human platelets. *Proc Natl Acad Sci USA* 89:1031-1035, 1992
  51. Gopalakrishna R, Chen ZH, Gundimeda U: Nitric oxide and nitric oxide-generating agents induce a reversible inactivation of protein kinase C activity and phorbol ester binding. *J Biol Chem* 268:27180-27185, 1993
  52. Radomski MW, Palmer RMJ, Moncada S: An L-arginine:nitric oxide pathway present in human platelets regulates aggregation. *Proc Natl Acad Sci USA* 87:5193-5197, 1990
